# Supplementary material for: A self-healing and recyclable poly(urea-imine) thermoset synthesized from CO2
Source: Royal Society of Chemistry journal article supplement (doi:10.1039/d1gc04441a), 2022-01-01
Supplement: d1gc04441a1.pdf [file d1gc04441a1.pdf]

## Supporting Information

### **A kind of self-healing and recyclable poly(urea-imine) thermoset synthesized from CO<sub>2</sub>**

*Peixuan Wu,<sup>a,b</sup> Xinchao Wang,<sup>a,b</sup> Ruhui Shi,<sup>a,b</sup> Haiyang Cheng <sup>\*a,b</sup> and Fengyu Zhao<sub>a,b</sub>*

<sup>a</sup> State Key Laboratory of Electroanalytical Chemistry, Changchun Institute of Applied Chemistry, Chinese Academy of Sciences, No. 5625 Renmin Rd., Changchun, 130022, China

E-mail: [hyeyl@ciac.ac.cn](mailto:hyeyl@ciac.ac.cn)

<sup>b</sup> Jilin Province Key Laboratory of Green Chemistry and Process, Changchun Institute of Applied Chemistry, Chinese Academy of Sciences, No. 5625 Renmin Rd., Changchun, 130022, China

### Measurement of molecular weight of oligourea

The  $M_n$  of CO<sub>2</sub>-based oligourea (OUa) was measured by acid-base titration (ASTM D2074-92) with a two-electrode automatic potentiometric titrator. The 0.1 M HCl/isopropanol standard solution was used as the titrate. The  $M_n$  was calculated by the following formula. The results were recorded using the mean number of three tests.

$$Mn = \frac{m}{c \times V/N} \times 1000$$

Where  $Mn$  was the number average molecular weight of the CO<sub>2</sub>-oligourea, g/mol;  $c$  was the concentration of HCl/isopropanol solution, mol/L;  $V$  was the Volume of HCl/isopropanol solution used at titration end point, ml;  $m$  was the mass of the CO<sub>2</sub>-oligourea used, g;  $N$  was the number of the end group for CO<sub>2</sub>-oligourea,  $N$  is 2. As a result,  $M_n$  of the CO<sub>2</sub>-based oligourea (OUa) used was 890 g mol<sup>-1</sup>.

### Recovery by chemical methods

The OUa<sub>2</sub>-T<sub>3</sub> sample (6.85 g) can be completely dissolved in methanol (100 mL) to form a homogenous yellow solution with adding new OUa (4.8 mmol). By adding new TA (15.6 mmol) and TAEA (7.2 mmol), the solution was stirred at 25 °C for 4 h and then placed in the Teflon mould. Then methanol was evaporated at room temperature for 24 h and the sample was dried at 80 °C for 12 h. A recycled OUa<sub>2</sub>-T<sub>3</sub> sample was obtained.

### Degradation process

OUa<sub>2</sub>-T<sub>3</sub> was cut into rectangular samples and then immersed respectively in a 10 mL of methanol/H<sub>2</sub>O (V:V = 1:1) and 10 mL 0.1 M HCl of methanol/H<sub>2</sub>O (V:V = 1:1) at room temperature. The degradation rate was calculated by weighing method, and the obtained degraded mixture was analyzed by FT-IR and <sup>13</sup>C NMR after evaporating out solvent.

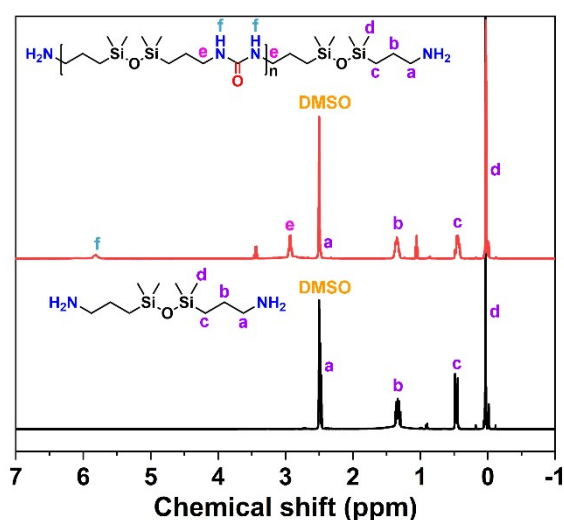

Fig. S1 <sup>1</sup>H NMR spectra of 1,3-bis(3-aminopropyl)tetramethyldisiloxane and oligourea.

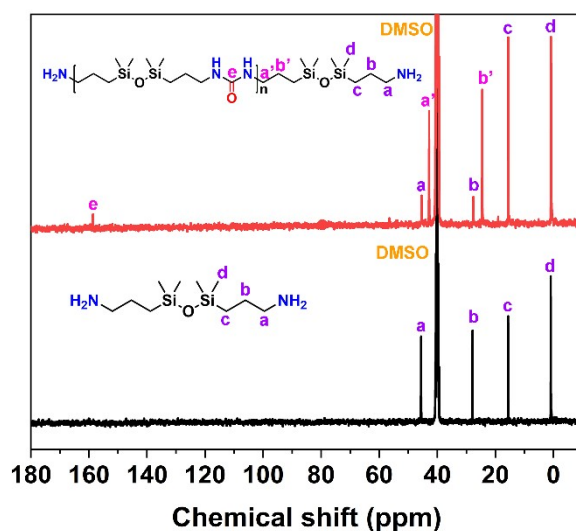

Fig. S2  $^{13}\text{C}$  NMR spectra of 1,3-bis(3-aminopropyl)tetramethyldisiloxane and oligourea.

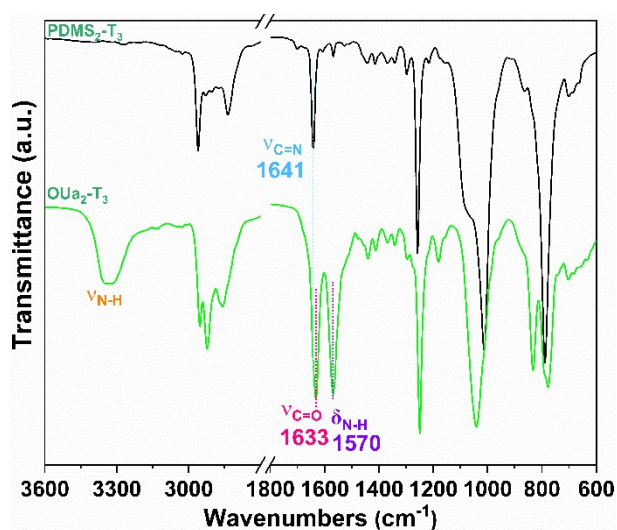

Fig. S3 FT-IR of PDMS<sub>2</sub>-T<sub>3</sub> and OUa<sub>2</sub>-T<sub>3</sub>.

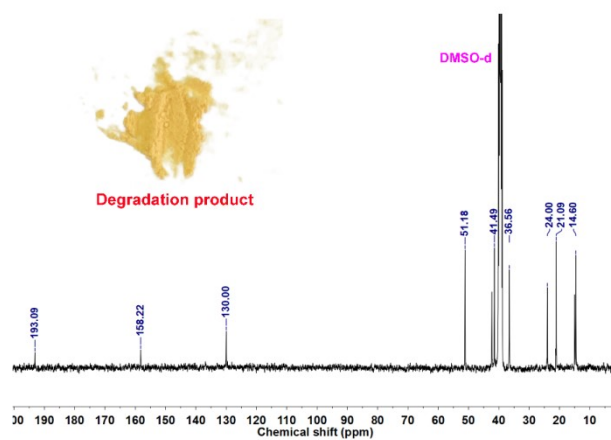

Fig. S4  $^{13}\text{C}$  NMR spectra of the degradation product of OUa<sub>2</sub>-T<sub>3</sub> in 0.1 M HCl methanol/H<sub>2</sub>O.

**Table S1** Summary of the OUa<sub>x</sub>-T<sub>y</sub> samples and their mechanical and thermal properties.

| Sample                           | OUa, TREA, TA molar ratio | T <sub>g</sub> (°C) <sup>a</sup> | T <sub>d,5%</sub> (°C) <sup>b</sup> | Tensile stress (MPa) | Elongation at break (%) | Young's modulus (MPa) |
|----------------------------------|---------------------------|----------------------------------|-------------------------------------|----------------------|-------------------------|-----------------------|
| OUa <sub>1</sub> -T <sub>0</sub> | 1:0:1                     | -7                               | 275                                 | /                    | /                       | /                     |
| OUa <sub>3</sub> -T <sub>2</sub> | 3:2:6                     | 4                                | 267                                 | 1.3 ± 0.1            | 257 ± 18                | 3.3 ± 0.5             |
| OUa <sub>1</sub> -T <sub>1</sub> | 1:1:2.5                   | 6                                | 268                                 | 4.3 ± 0.5            | 98 ± 10                 | 56 ± 8                |
| OUa <sub>2</sub> -T <sub>3</sub> | 2:3:6.5                   | 11                               | 274                                 | 10.2 ± 0.2           | 51 ± 6                  | 79 ± 8                |
| OUa <sub>0</sub> -T <sub>1</sub> | 0:1:1.5                   | 123                              | 250                                 | 23.5 ± 2.6           | 4 ± 0.3                 | 620 ± 45              |

<sup>a</sup> T<sub>g</sub> is glass transition temperature, which is measured by DSC.

<sup>b</sup> T<sub>d,5%</sub> is the initial decomposition temperature (the temperature of 5% weight loss).

**Table S2** Mechanical properties of original and self-healed OUa<sub>2</sub>-T<sub>3</sub>.

| Entry    | Tensile stress (MPa) | Elongation at break (%) | Young's modulus (MPa) |
|----------|----------------------|-------------------------|-----------------------|
| Original | 10.2 ± 0.2           | 51 ± 6                  | 79 ± 8                |
| Healed   | 9.4 ± 0.3            | 53 ± 4                  | 63 ± 6                |

**Table S3** Mechanical properties of original and reprocessed OUa<sub>2</sub>-T<sub>3</sub>.

| Entry           | Tensile stress (MPa) | Elongation at break (%) | Young's modulus (MPa) |
|-----------------|----------------------|-------------------------|-----------------------|
| Original        | 10.2 ± 0.2           | 51 ± 6                  | 79 ± 8                |
| 1st reprocessed | 10.6 ± 0.1           | 54 ± 3                  | 74 ± 4                |
| 2nd reprocessed | 9.7 ± 0.8            | 52 ± 2                  | 72 ± 10               |
| 3rd reprocessed | 10.3 ± 0.6           | 52 ± 3                  | 78 ± 3                |

**Table S4** Mechanical properties of original and reprocessed OUa<sub>2</sub>-T<sub>3</sub>.

| Entry    | Tensile stress (MPa) | Elongation at break (%) | Young's modulus (MPa) |
|----------|----------------------|-------------------------|-----------------------|
| Original | 10.2 ± 0.2           | 51 ± 6                  | 79 ± 8                |
| Recycled | 7.9 ± 1.5            | 54 ± 1                  | 67 ± 9                |
